# Supplementary material
Source: PubMed Central journal article supplement (PMC2659619)
Supplement: NIHMS93258-supplement-01.pdf [file NIHMS93258-supplement-01.pdf]

|                                         | SC-1     |        |           |             | SC-2     |        |           |             | SC-3     |        |           |             | SC-4     |        |           |             |
|-----------------------------------------|----------|--------|-----------|-------------|----------|--------|-----------|-------------|----------|--------|-----------|-------------|----------|--------|-----------|-------------|
|                                         | Selected | Cloned | Expressed | DDM soluble | Selected | Cloned | Expressed | DDM soluble | Selected | Cloned | Expressed | DDM soluble | Selected | Cloned | Expressed | DDM soluble |
| Number of successful targets            | 96       | 87     | 72        | 61          | 96       | 91     | 72        | 58          | 96       | 85     | 62        | 52          | 96       | 88     | 66        | 63          |
| Percentage relative to previous step    |          | 91%    | 83%       | 85%         |          | 95%    | 79%       | 81%         |          | 89%    | 73%       | 84%         |          | 92%    | 73%       | 95%         |
| Percentage relative to starting targets |          | 91%    | 75%       | 64%         |          | 95%    | 75%       | 60%         |          | 89%    | 65%       | 54%         |          | 92%    | 69%       | 66%         |

|                                         | Combined 4 groups |        |           |             |
|-----------------------------------------|-------------------|--------|-----------|-------------|
|                                         | Selected          | Cloned | Expressed | DDM soluble |
| Number of successful targets            | 384               | 351    | 272       | 234         |
| Percentage relative to previous step    |                   | 91%    | 77%       | 86%         |
| Percentage relative to starting targets |                   | 91%    | 71%       | 61%         |

| UniProt ID | Protein Name | Function                   | Molecular Weight (Da) | Expression | Solubilization | Void Check |
|------------|--------------|----------------------------|-----------------------|------------|----------------|------------|
| Q99808     | hENT1        | nucleoside transporter     | 50216                 | ***        | ***            |            |
| Q14542     | hENT2        | nucleoside transporter     | 50110                 | ***        | ***            |            |
| Q9BZD2     | hENT3        | nucleoside transporter     | 51712                 | **         | ***            |            |
| O00337     | hCNT1        | nucleoside transporter     | 71580                 | *          | **             |            |
| O43868     | hCNT2        | nucleoside transporter     | 71991                 | **         | **             |            |
| Q9HAS3     | hCNT3        | nucleoside transporter     | 76925                 | **         | **             | V          |
| Q9H015     | hOCTN1       | organic cation transporter | 62151                 | ***        | *              |            |
| P14859     | hOCT1        | organic cation transporter | 61150                 | *          | **             |            |
| P09086     | hOCT2        | organic cation transporter | 62560                 | **         | *              |            |
| Q01860     | hOCT3        | organic cation transporter | 61276                 | *          | *              |            |
